# Supplementary material
Source: ML conference proceedings conference paper supplement (https://proceedings.mlr.press/v70/reed17a.html)
Supplement: Supplementary file 1 [file reed17a-supp.zip]

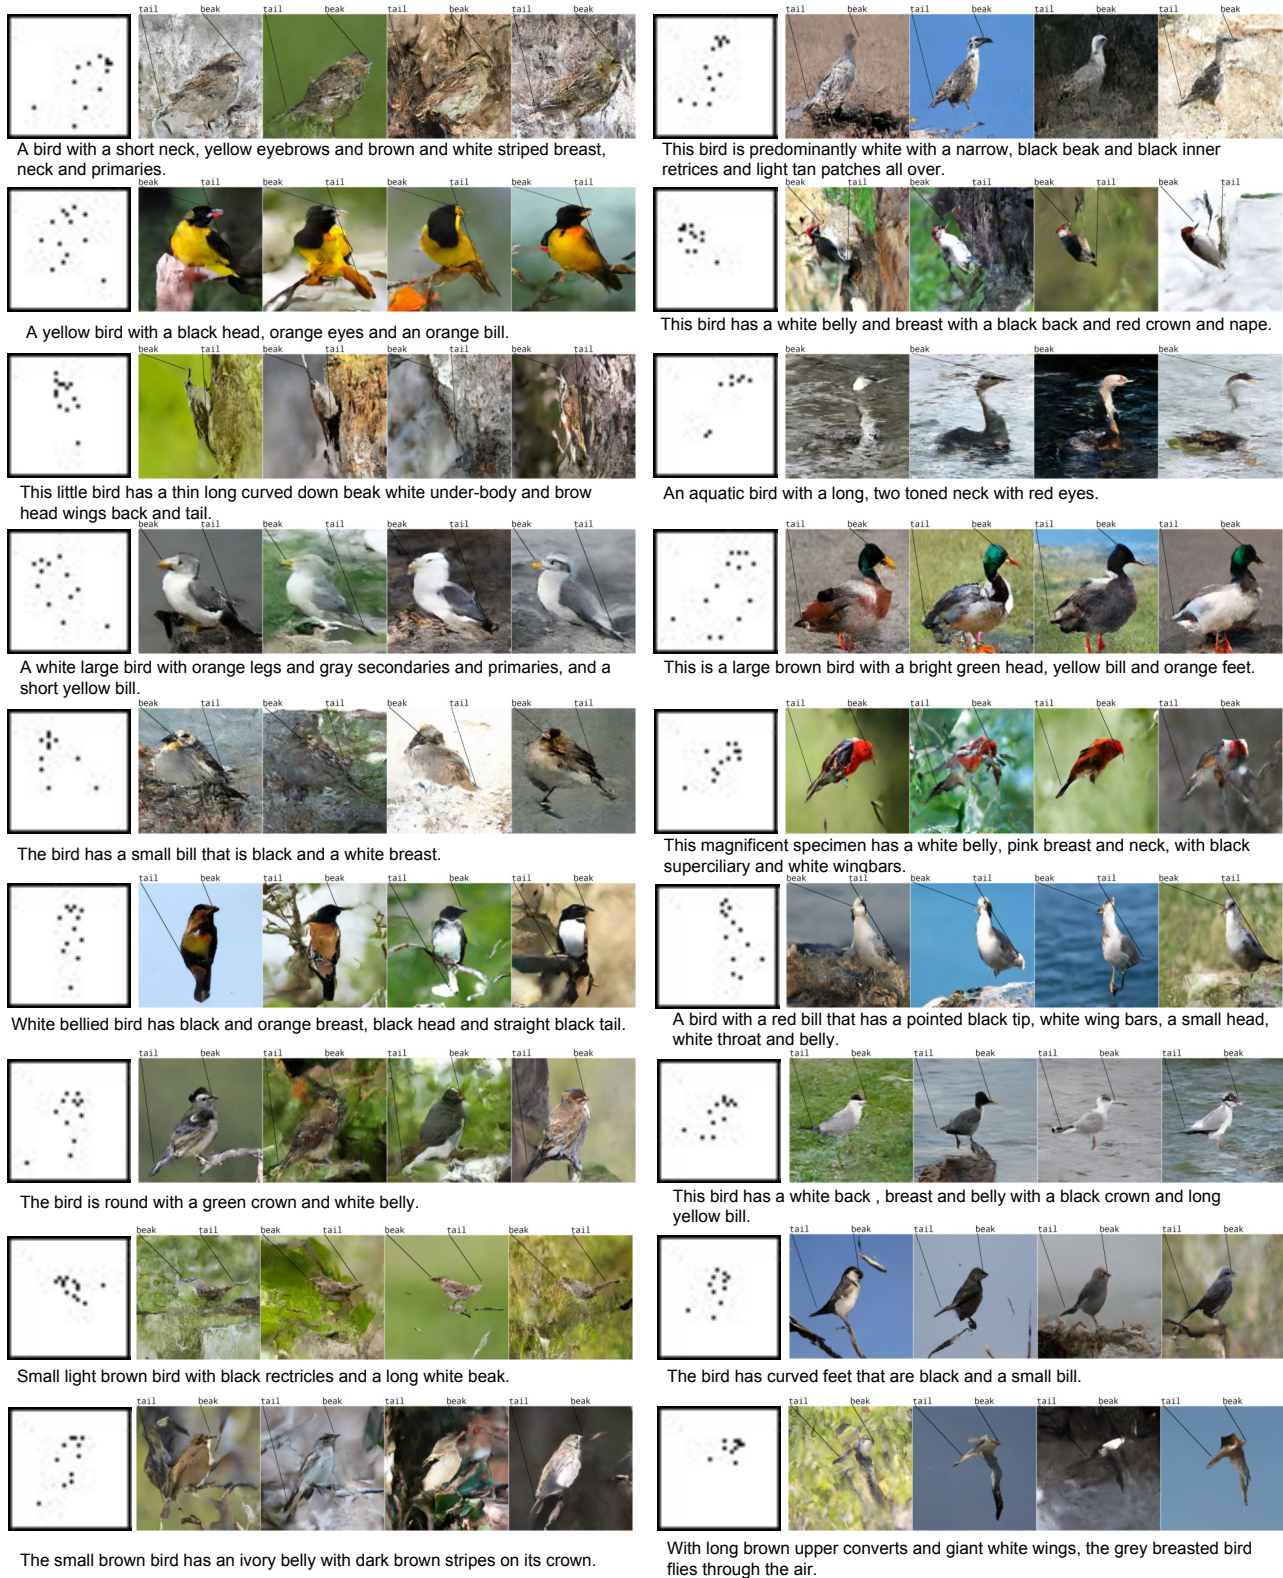

Figure 9. Additional CUB samples randomly chosen from the validation set.

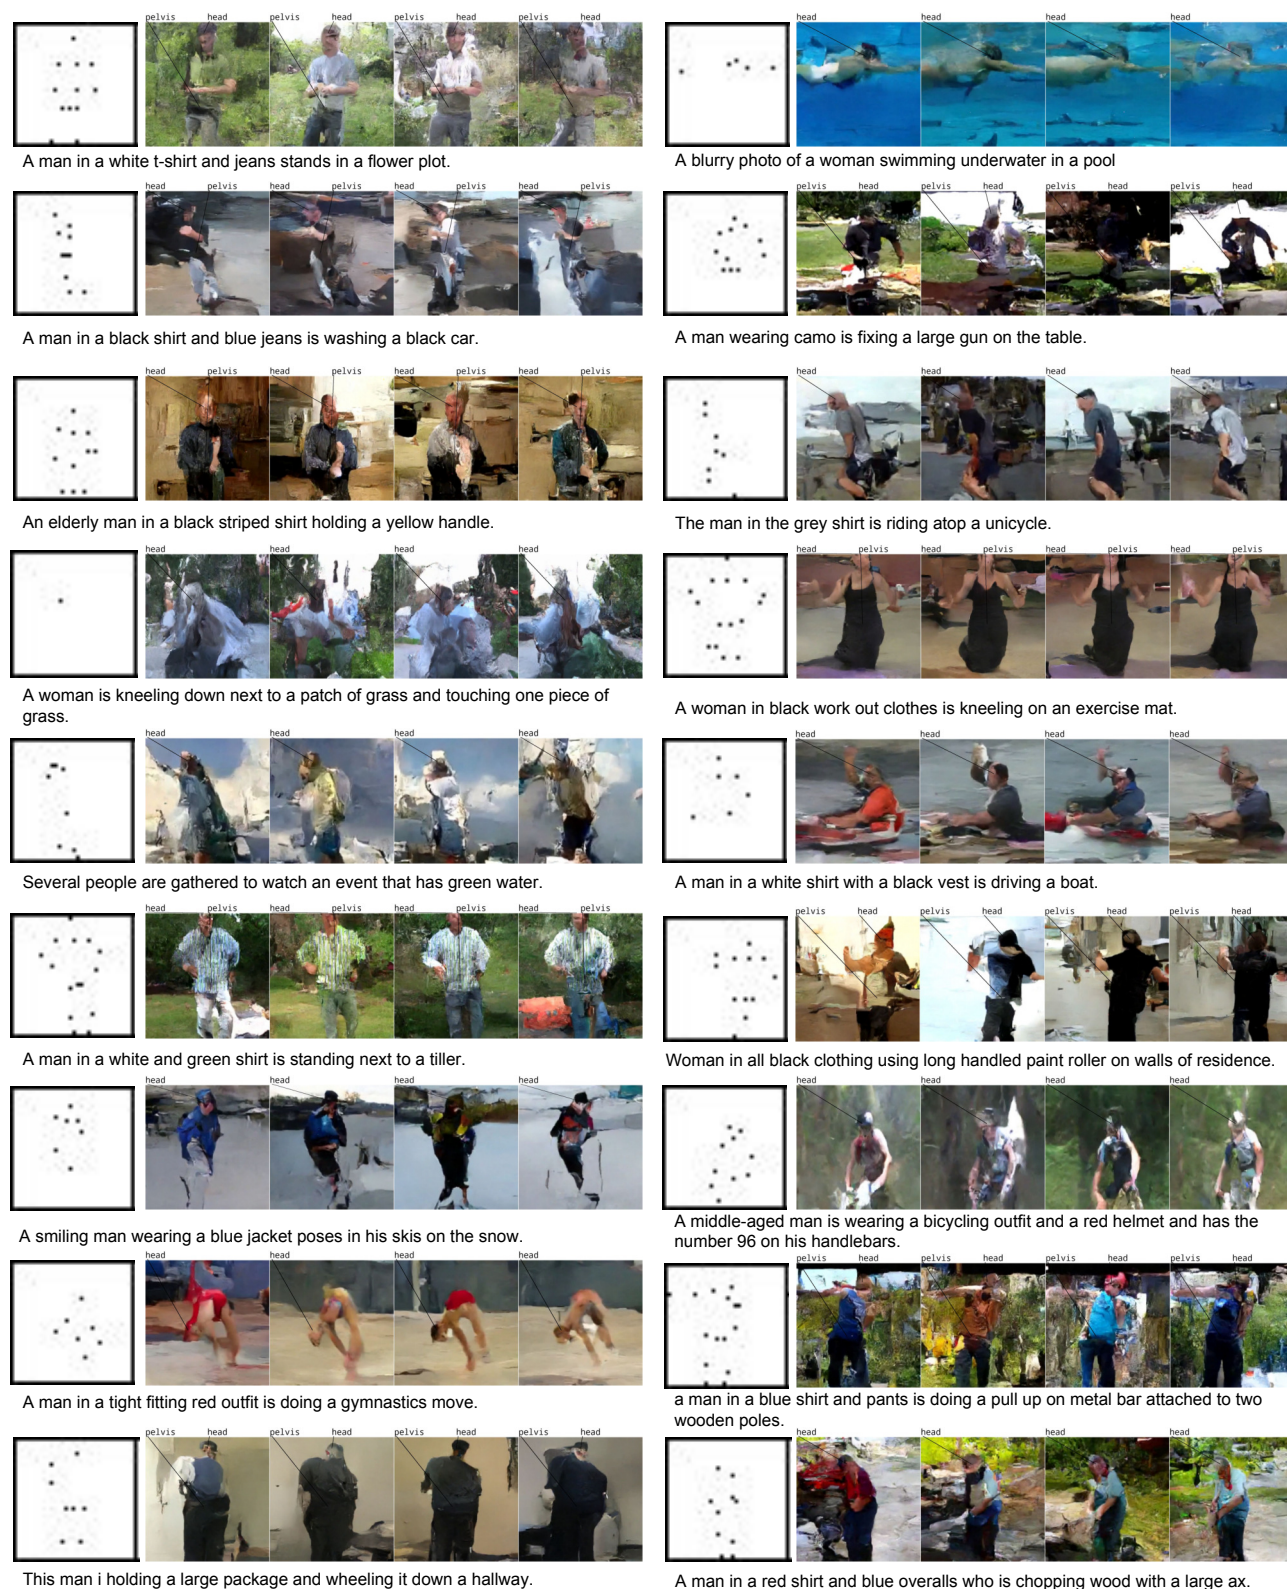

Figure 10. Additional MPII samples randomly chosen from the validation set.

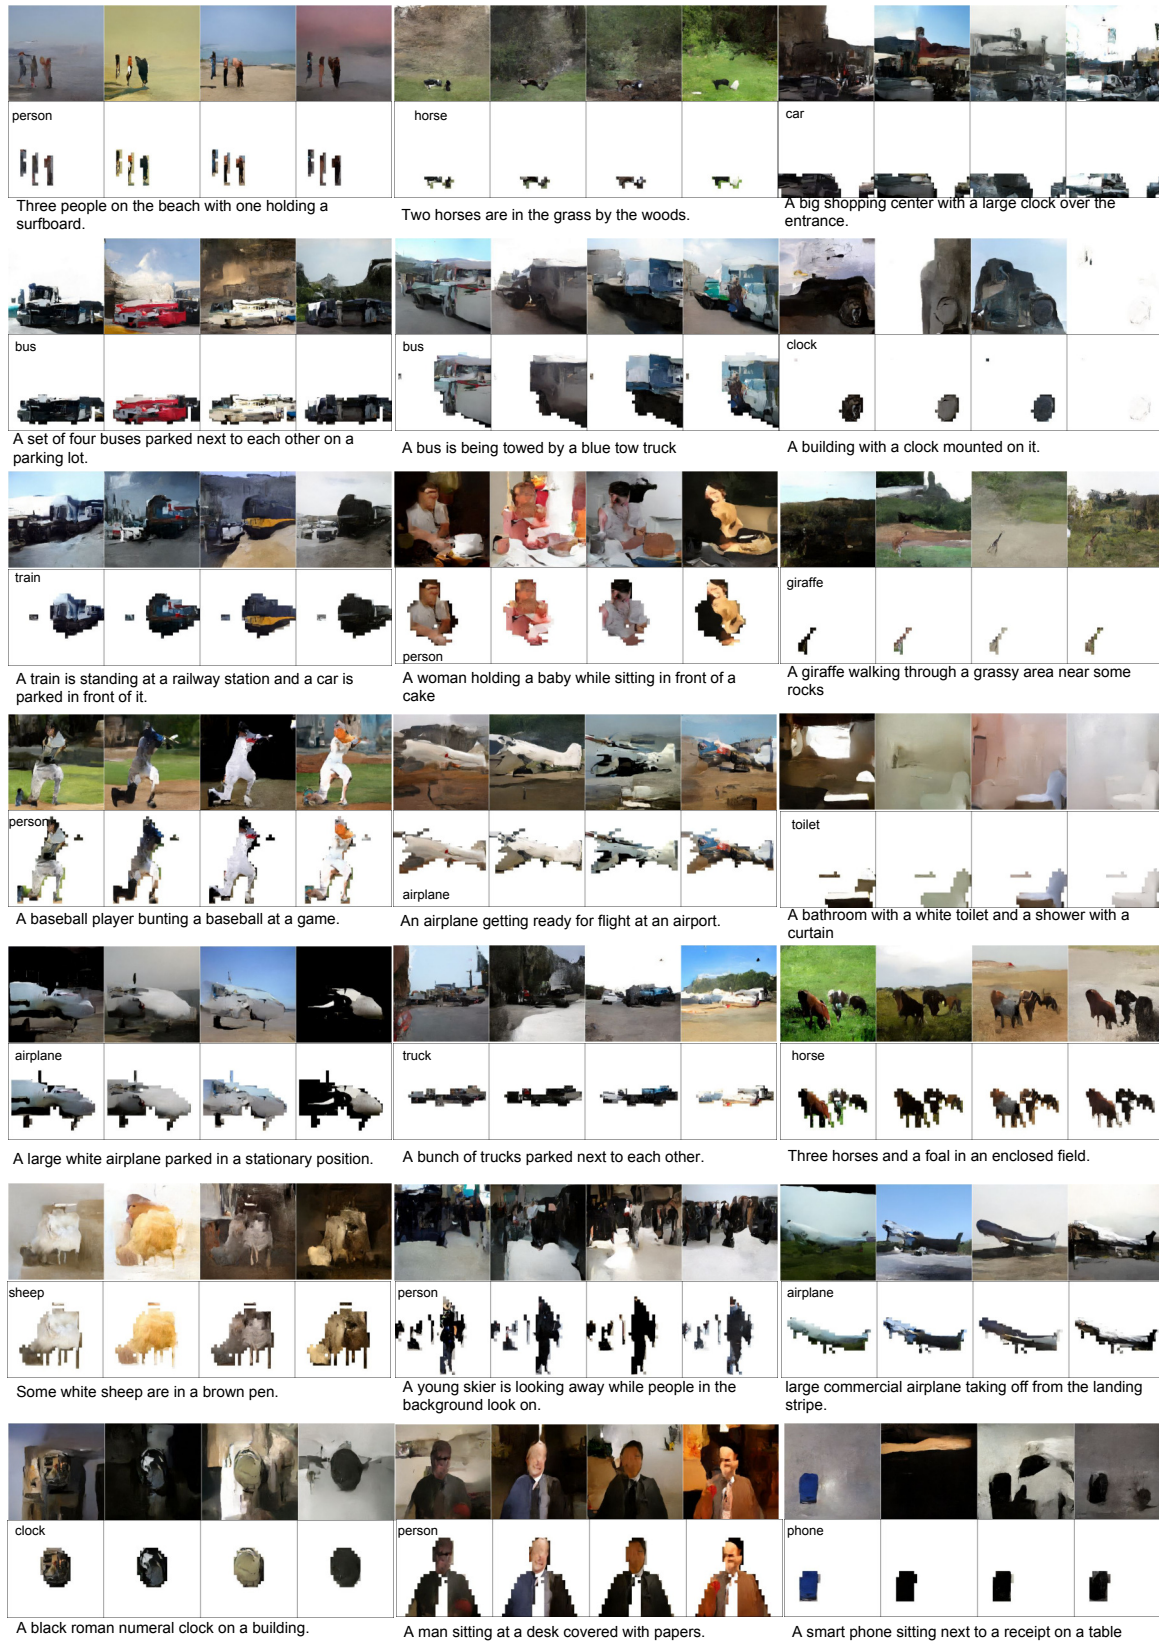

Figure 11. Additional MS-COCO samples randomly chosen from the validation set.

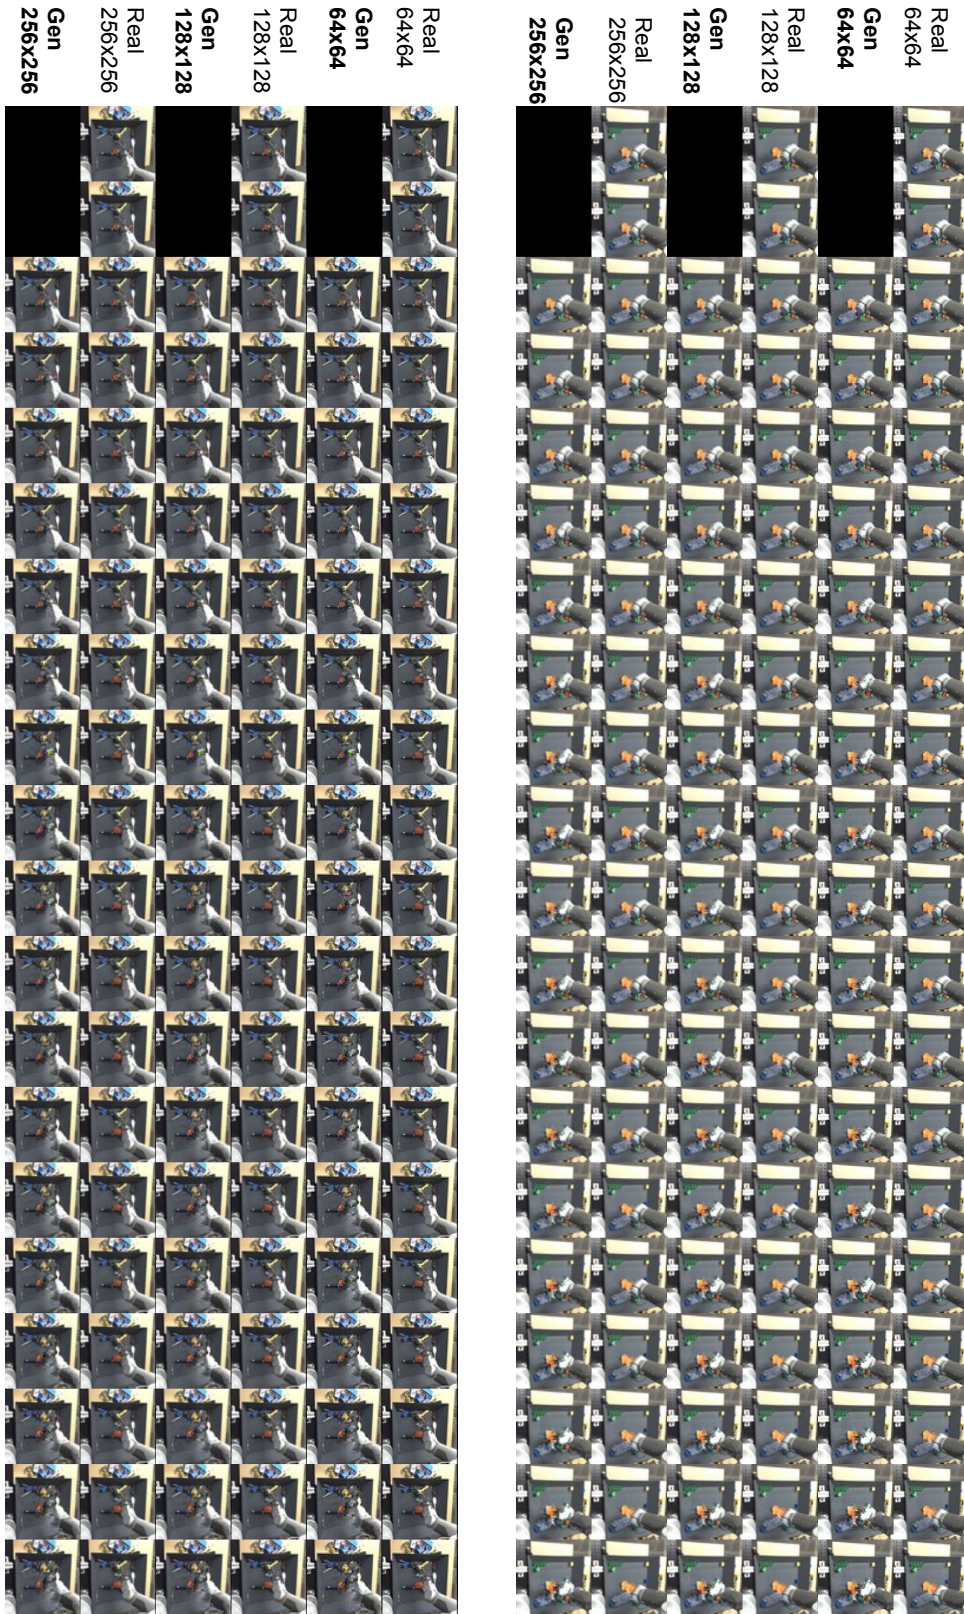

Figure 12. Robot pushing videos at  $64 \times 64$ ,  $128 \times 128$  and  $256 \times 256$ .

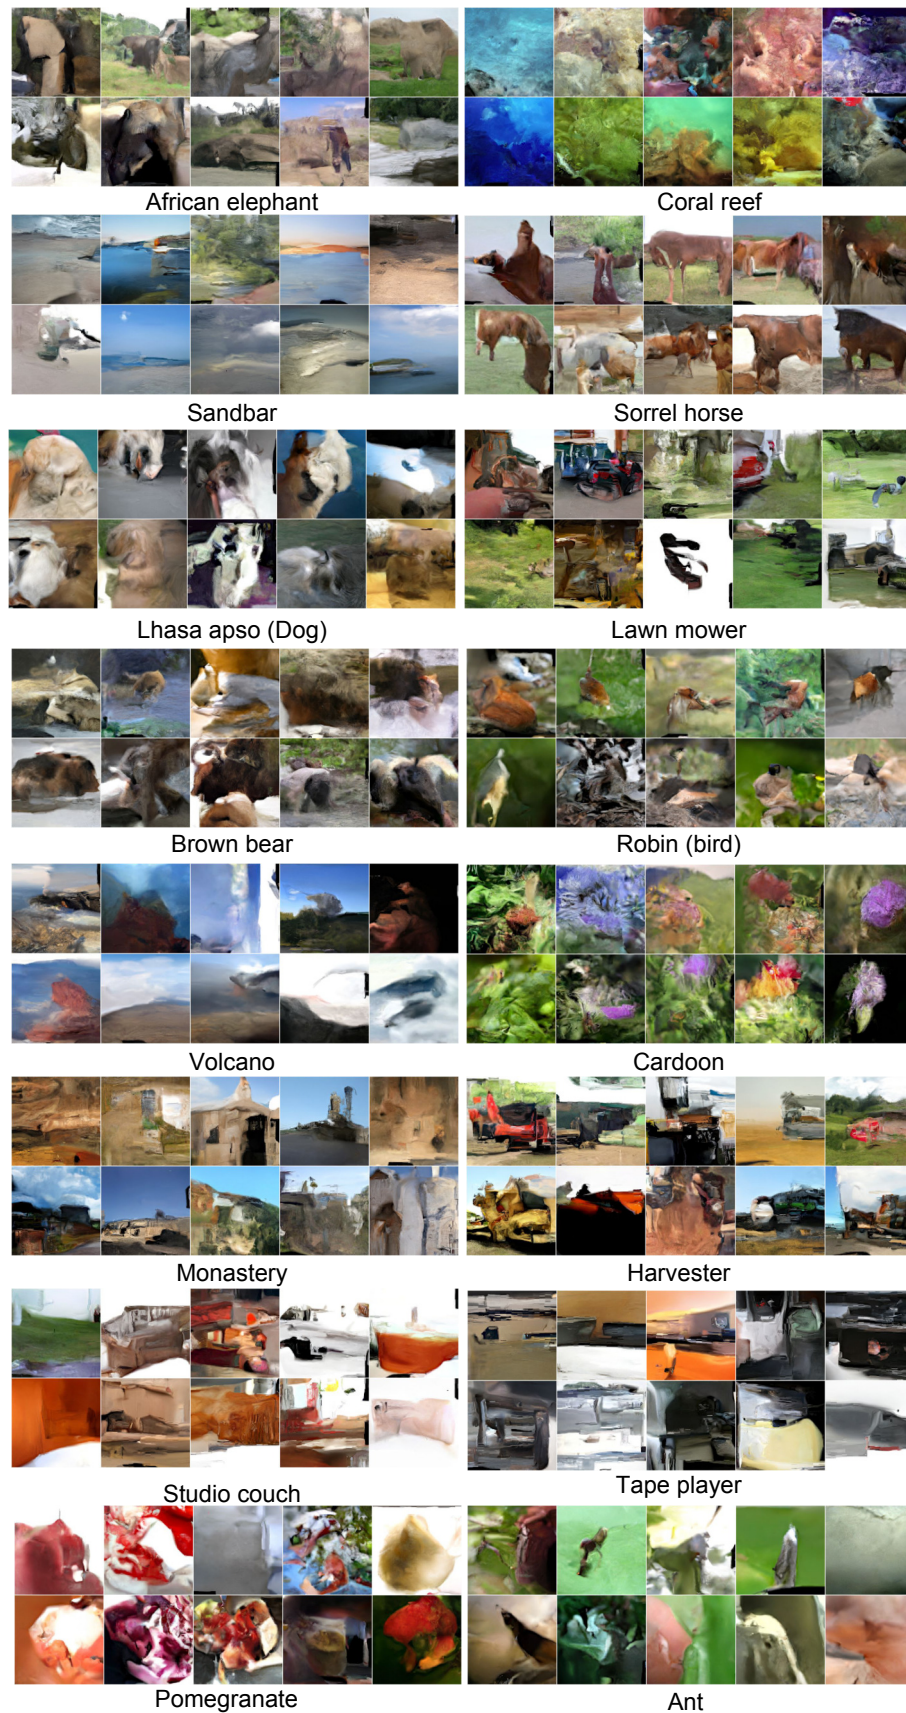

Figure 13. Label-conditional  $128 \times 128$  ImageNet samples.

**32 x 32 → 512 x 512**

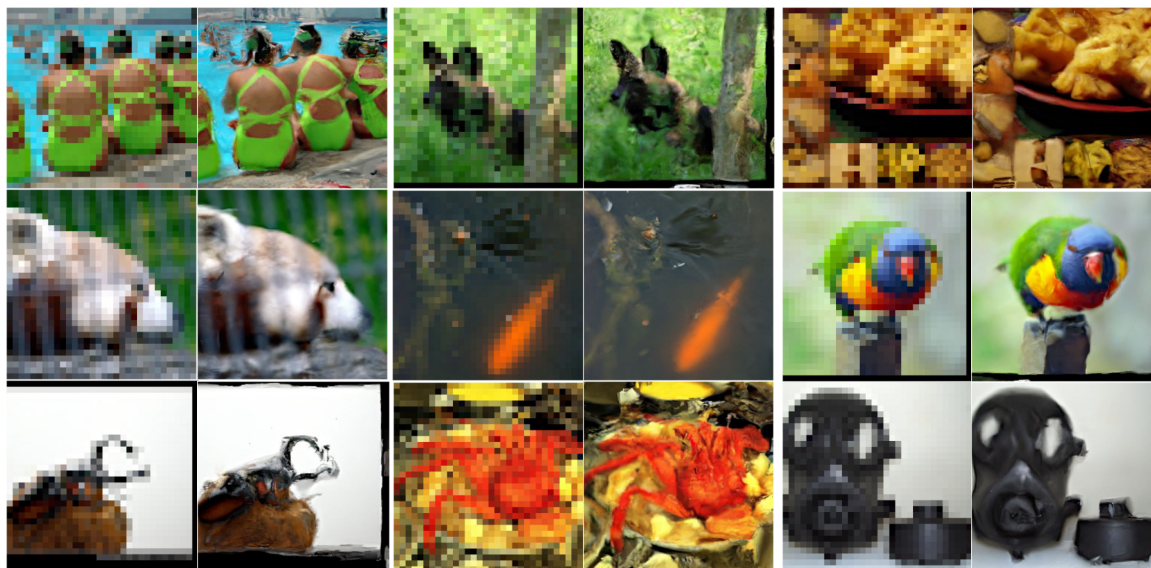

**16 x 16 → 512 x 512**

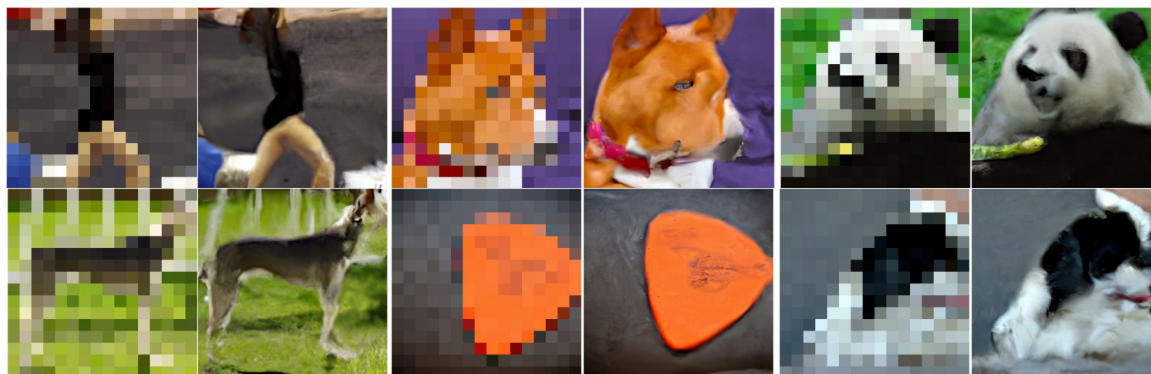

**8 x 8 → 512 x 512**

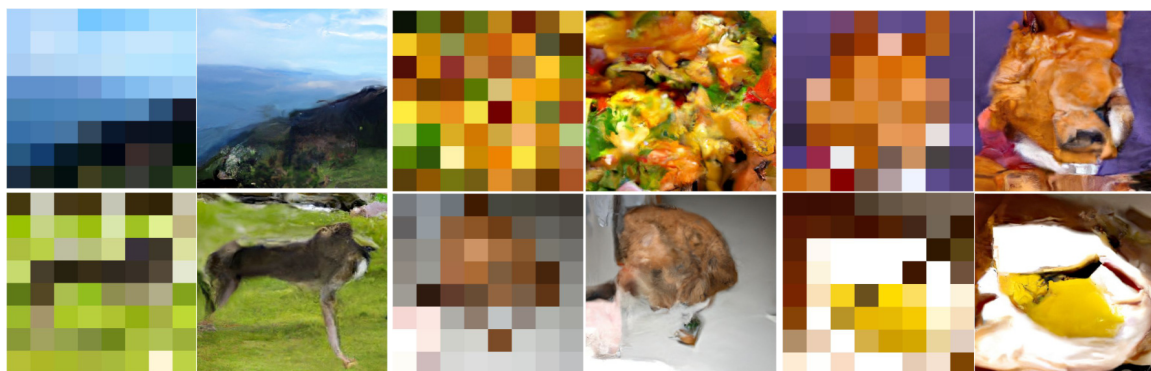

Figure 14. Additional upscaling samples.

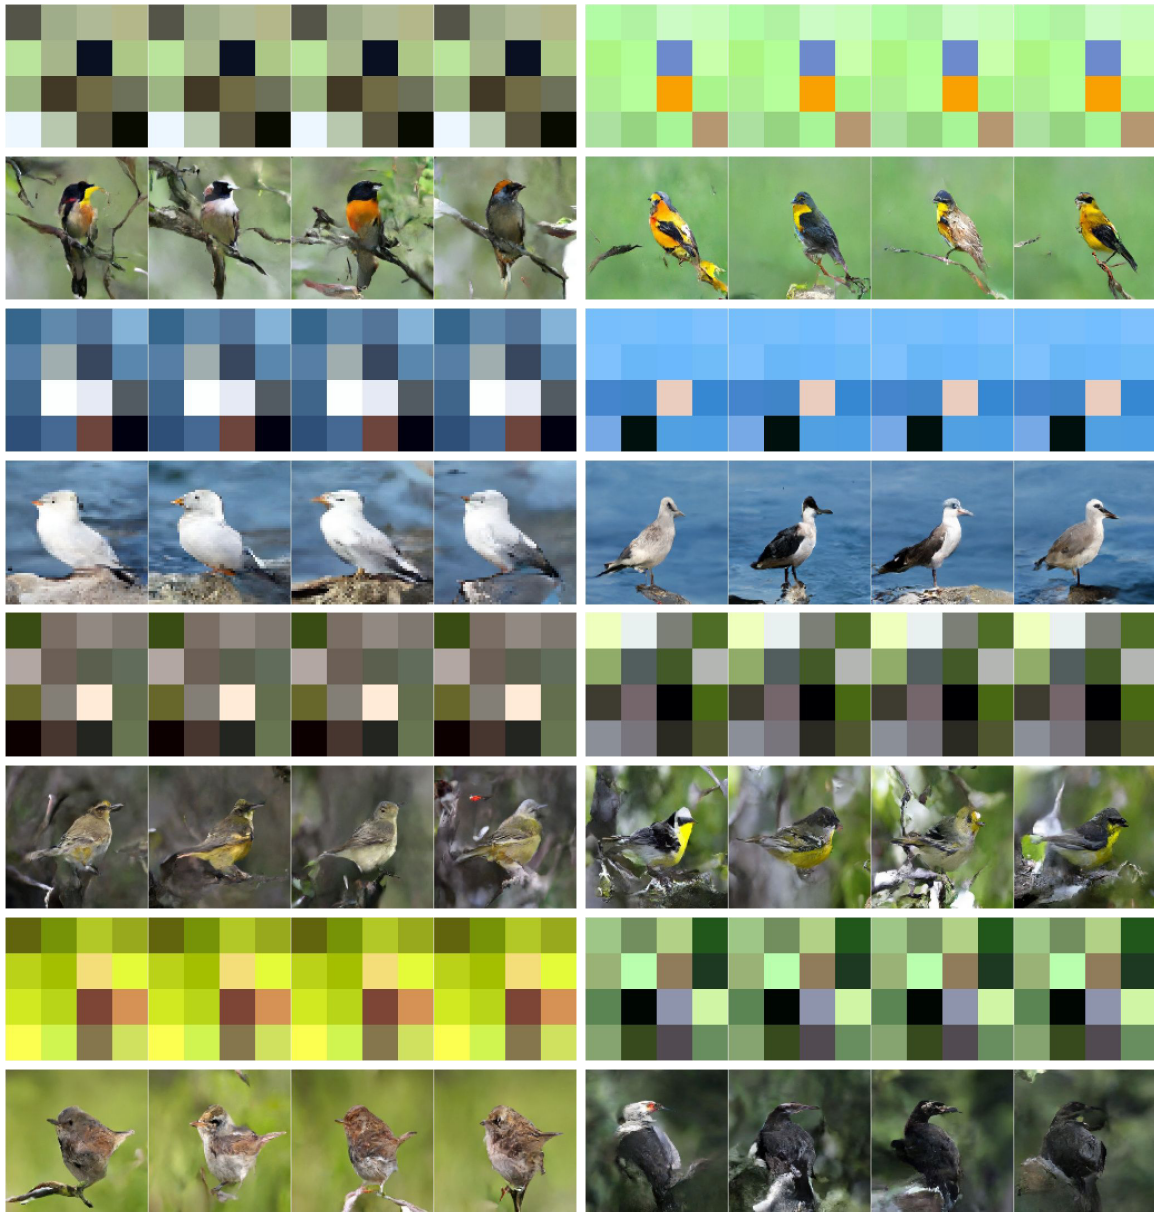

Figure 15. Diverse upscaling starting from the same base low-resolution image.
