# Supplementary material
Source: ML conference proceedings conference paper supplement (https://proceedings.mlr.press/v70/reed17a.html)
Supplement: Supplementary file 2 [file reed17a-supp.zip]

Archive with 2 entries (2 files):
- icml2017_appendix.pdf
- README
