# Supplementary material
Source: ML conference proceedings conference paper supplement (https://proceedings.mlr.press/v70/reed17a.html)
Supplement: Supplementary file 2 [file reed17a-supp.zip › README]

This folder contains the appendix PDF, and a link to the supplementary material here:

https://drive.google.com/file/d/0BxsKIWy5m8g8eER1WHNMMHJBUDg/view?usp=sharing

It contains the following:

CUB
Text- and keypoint-conditional 256x256 samples from CUB validation set.
There are two HTML files:
- cub_256_t1.1.html : softmax temperature = 1.1 during sampling
- cub_256_t1.2.html : softmax temperature = 1.2 during sampling
There are three videos showing the sampling procedure with queries:
- cub_video1.gif : "A yellow bird with a black head, orange eyes and an orange bill"
- cub_video2.gif : "A white large bird with orange legs and gray secondaries and primaries, and a short yellow bill."
- cub_video3.gif : "This is a large brown bird with a bright green head, yellow bill and orange feet."

MPII
Text- and keypoint-conditional 256x256 samples from MPII validation set.
There are two HTML files:
- mpii_256_t1.1.html : softmax temperature = 1.1 during sampling
- mpii_256_t1.2.html : softmax temperature = 1.2 during sampling

MS-COCO
Text- and segmentation-conditional 256x256 samples from MS-COCO validation set.
There are two HTML files:
- coco_256_t1.1.html : softmax temperature = 1.1 during sampling
- coco_256_t1.2.html : softmax temperature = 1.2 during sampling

ImageNet:
Label-conditional 128x128 samples and lores-conditional 512x512 samples.
There are two PDF files:
- imagenet_128_t1.1.pdf : class-conditional 128x128 samples, temperature = 1.1.
- imagenet_upscaling.pdf : 512x512 super-resolution samples, temperature = 1.1.

Robot Pushing:
Video prediction at 64x64, 128x128 and 256x256.
There is one file showing frames from several generated videos:
- robot_multiscale.pdf
The video files are:
- robot_video1.gif
- robot_video2.gif
- robot_video3.gif
- robot_video4.gif
- robot_video5.gif
